# Supplementary material for: The Intergenerational Impacts of Paternal Diet on DNA Methylation and Offspring Phenotypes in Sheep
Source: Front Genet. 2020 Nov 5;11:597943. doi: 10.3389/fgene.2020.597943 (PMC7674940; doi:10.3389/fgene.2020.597943)
Supplement: Supplementary file 5 [file Table_3.XLSX]

## Sheet: FunctionAnalysis-GeneInput
All_Genes				Hypomethylated					Hypermethylated
diffMeth	GeneID	DMC/DMR			diffMeth	GeneID	DMC/DMR		diffMeth	GeneID	DMC/DMR
-60.0266	MTMR2	DMC			-60.0266	MTMR2	DMC		25.2528	ADCK1	DMC
-58	DSP	DMC			-58	DSP	DMC		25.7143	HTT	DMC
-56.3871	DSP	DMC			-56.3871	DSP	DMC		25.7143	LAMP1	DMC
-55.4545	PARVB	DMC			-55.4545	PARVB	DMC		26.2295	PTP4A3	DMC
-54.7742	DSP	DMC			-54.7742	DSP	DMC		26.6667	COL14A1	DMC
-54.2053	MTMR2	DMC			-54.2053	MTMR2	DMC		26.7857	COL4A1	DMC
-51.4368	CELSR1	DMC			-51.4368	CELSR1	DMC		27.5505	5S_rRNA	DMC
-50.9804	ITPR3	DMC			-50.9804	ITPR3	DMC		27.5505	TRAPPC9	DMC
-50.6111	DSP	DMC			-50.6111	DSP	DMC		27.6154	GMDS	DMC
-50.6098	SPTB	DMC			-50.6098	SPTB	DMC		28.125	5S_rRNA	DMC
-50.3387	TTLL1	DMC			-50.3387	TTLL1	DMC		28.2094	5S_rRNA	DMC
-49.9503	RASAL3	DMC			-49.9503	RASAL3	DMC		28.2601	HTT	DMC
-49.484	CECR2	DMC			-49.484	CECR2	DMC		28.4341	SRI	DMC
-48.8636	SPTB	DMC			-48.8636	SPTB	DMC		28.6102	TAPT1	DMC
-48.8589	EIF3D	DMC			-48.8589	EIF3D	DMC		28.7364	UVSSA	DMC
-48.6683	PRR5	DMC			-48.6683	PRR5	DMC		29.0909	CUL9	DMC
-48.4296	PARVB	DMC			-48.4296	PARVB	DMC		29.0909	DNPH1	DMC
-48.2684	HIPK2	DMC			-48.2684	HIPK2	DMC		29.8419	CERK	DMC
-48.1283	TRMU	DMC			-48.1283	TRMU	DMC		29.955	HTT	DMC
-47.3485	POLN	DMC			-47.3485	POLN	DMC		30.1075	SH3TC1	DMC
-46.9983	GRPEL1	DMC			-46.9983	GRPEL1	DMC		30.2857	TRMT44	DMC
-46.8937	BMP6	DMC			-46.8937	BMP6	DMC		30.2985	CDYL	DMC
-46.8338	A4GALT	DMC			-46.8338	A4GALT	DMC		30.3553	CRLF2	DMC
-46.7742	FGFR3	DMC			-46.7742	FGFR3	DMC		30.3553	CRLF2	DMC
-46.6193	PARVG	DMC			-46.6193	PARVG	DMC		31.25	TRAPPC9	DMC
-46.0916	FLNC	DMC			-46.0916	FLNC	DMC		31.342	WDR46	DMC
-46.0539	HTT	DMC			-46.0539	HTT	DMC		31.4724	DUSP16	DMC
-45.5529	FBLN1	DMC			-45.5529	FBLN1	DMC		31.694	5S_rRNA	DMC
-44.6429	COL14A1	DMC			-44.6429	COL14A1	DMC		31.9056	VAV2	DMC
-44.6429	COL14A1	DMC			-44.6429	COL14A1	DMC		32.3051	TAPT1	DMC
-44.6429	COL14A1	DMC			-44.6429	COL14A1	DMC		32.437	KRT7	DMC
-44.5382	TIGAR	DMC			-44.5382	TIGAR	DMC		32.5	TAPT1	DMC
-44.5	HTT	DMC			-44.5	HTT	DMC		32.8358	EMG1	DMC
-43.6421	HTT	DMC			-43.6421	HTT	DMC		33.4737	COPE	DMC
-43.5897	UNC93A	DMC			-43.5897	UNC93A	DMC		33.7811	LINGO3	DMC
-43.4401	CELSR1	DMC			-43.4401	CELSR1	DMC		33.9286	MYDGF	DMC
-43.0556	CDPF1	DMC			-43.0556	CDPF1	DMC		34	SLC45A4	DMC
-42.7173	DCP1B	DMC			-42.7173	DCP1B	DMC		34.2365	TXNDC5	DMC
-42.4607	SORCS2	DMC			-42.4607	SORCS2	DMC		34.3414	VPS52	DMC
-42.3155	EFCAB6	DMC			-42.3155	EFCAB6	DMC		34.359	CACNA1I	DMC
-42.136	EFCAB6	DMC			-42.136	EFCAB6	DMC		34.3636	RASD2	DMC
-42.0513	UNC93A	DMC			-42.0513	UNC93A	DMC		34.6939	TAPT1	DMC
-42.042	NDUFB7	DMC			-42.042	NDUFB7	DMC		34.9842	IL17REL	DMC
-42.042	TECR	DMC			-42.042	TECR	DMC		35.0414	HTT	DMC
-42.035	FGFR3	DMC			-42.035	FGFR3	DMC		35.2941	GPR20	DMC
-41.7544	POLN	DMC			-41.7544	POLN	DMC		35.3125	ERMARD	DMC
-41.7544	POLN	DMC			-41.7544	POLN	DMC		35.3623	ITPR3	DMC
-41.4865	SCUBE1	DMC			-41.4865	SCUBE1	DMC		35.4391	TTC7B	DMC
-41.4865	SCUBE1	DMC			-41.4865	SCUBE1	DMC		35.8182	CHD7	DMC
-41.1077	CELSR1	DMC			-41.1077	CELSR1	DMC		35.9184	CELSR1	DMC
-41.0289	MPPED1	DMC			-41.0289	MPPED1	DMC		35.9358	TRAPPC9	DMC
-41.0171	CACNA1C	DMC			-41.0171	CACNA1C	DMC		36.0793	TRMU	DMC
-40.7648	CRLF2	DMC			-40.7648	CRLF2	DMC		36.0833	THBS2	DMC
-40.2985	MCM5	DMC			-40.2985	MCM5	DMC		36.0859	ITPR3	DMC
-40.1715	ABLIM2	DMC			-40.1715	ABLIM2	DMC		36.5747	THBS2	DMC
-40	TTC38	DMC			-40	TTC38	DMC		36.8116	ITPR3	DMC
-40	TTC38	DMC			-40	TTC38	DMC		36.9696	RPP40	DMC
-39.8175	WDR18	DMC			-39.8175	WDR18	DMC		37.4762	TTC7B	DMC
-39.8132	SUGP1	DMC			-39.8132	SUGP1	DMC		37.6119	SHANK3	DMC
-39.8132	TM6SF2	DMC			-39.8132	TM6SF2	DMC		37.6393	ARMC6	DMC
-39.7241	SCUBE1	DMC			-39.7241	SCUBE1	DMC		37.75	THBS2	DMC
-39.4523	MGAT1	DMC			-39.4523	MGAT1	DMC		37.8307	UNC93A	DMC
-39.0625	KIF25	DMC			-39.0625	KIF25	DMC		37.9221	THBS2	DMC
-39.0023	POLR1A	DMC			-39.0023	POLR1A	DMC		37.9874	THBS2	DMC
-38.75	KANK2	DMC			-38.75	KANK2	DMC		38.0057	PNPLA3	DMC
-38.6154	SCUBE1	DMC			-38.6154	SCUBE1	DMC		38.0952	CFAP77	DMC
-38.3721	GCC1	DMC			-38.3721	GCC1	DMC		38.1264	TTLL1	DMC
-38.3659	ABLIM2	DMC			-38.3659	ABLIM2	DMC		38.4572	ARFGAP3	DMC
-38.3459	LETM1	DMC			-38.3459	LETM1	DMC		38.6688	TSPAN9	DMC
-38.1941	HTRA3	DMC			-38.1941	HTRA3	DMC		38.75	5S_rRNA	DMC
-38.0135	NRIP2	DMC			-38.0135	NRIP2	DMC		38.8798	LRIG3	DMC
-37.913	SMAP1	DMC			-37.913	SMAP1	DMC		38.9227	MICAL3	DMC
-37.8369	ADAMTS2	DMC			-37.8369	ADAMTS2	DMC		39.2094	FGD2	DMC
-37.3854	HTRA3	DMC			-37.3854	HTRA3	DMC		39.3316	CRTC1	DMC
-37.3746	COMP	DMC			-37.3746	COMP	DMC		39.3316	U6	DMC
-37.3134	TRAPPC9	DMC			-37.3134	TRAPPC9	DMC		39.3557	MAP4K4	DMC
-37.2397	RASD2	DMC			-37.2397	RASD2	DMC		39.4029	PRMT8	DMC
-37.1474	TRMU	DMC			-37.1474	TRMU	DMC		39.8148	CLRN2	DMC
-37.0018	MYO16	DMC			-37.0018	MYO16	DMC		39.8333	THBS2	DMC
-36.987	TECR	DMC			-36.987	TECR	DMC		39.9351	ITPR3	DMC
-36.718	CRMP1	DMC			-36.718	CRMP1	DMC		40.0124	TAB1	DMC
-36.6491	LRIG3	DMC			-36.6491	LRIG3	DMC		40.6082	MPPED1	DMC
-36.6453	ADD1	DMC			-36.6453	ADD1	DMC		40.6265	HTT	DMC
-36.5209	MPPED1	DMC			-36.5209	MPPED1	DMC		40.6667	DHRSX	DMC
-36.5152	SGTA	DMC			-36.5152	SGTA	DMC		40.6751	PNPLA3	DMC
-36.1529	DCAF15	DMC			-36.1529	DCAF15	DMC		42.0099	CELSR1	DMC
-36.1529	RFX1	DMC			-36.1529	RFX1	DMC		42.9825	CACNA2D4	DMC
-35.9539	MROH5	DMC			-35.9539	MROH5	DMC		43.1597	TUBA8	DMC
-35.9341	GRAMD4	DMC			-35.9341	GRAMD4	DMC		43.6508	SORCS2	DMC
-35.7143	SHISAL1	DMC			-35.7143	SHISAL1	DMC		43.7992	CECR2	DMC
-35.6313	CAMK2B	DMC			-35.6313	CAMK2B	DMC		44.4219	SCUBE1	DMC
-35.5619	GGA1	DMC			-35.5619	GGA1	DMC		44.4691	HTT	DMC
-35.5556	SLC45A4	DMC			-35.5556	SLC45A4	DMC		45.149	ARHGEF40	DMC
-35.0353	GATAD2A	DMC			-35.0353	GATAD2A	DMC		45.2124	NRIP2	DMC
-35.0166	DCP1B	DMC			-35.0166	DCP1B	DMC		45.8917	FAM193A	DMC
-34.9061	FCHO1	DMC			-34.9061	FCHO1	DMC		45.9002	FGD2	DMC
-34.8631	CELSR1	DMC			-34.8631	CELSR1	DMC		45.9002	FGD2	DMC
-34.8554	TRMU	DMC			-34.8554	TRMU	DMC		46.25	TAB1	DMC
-34.8421	SLC22A23	DMC			-34.8421	SLC22A23	DMC		47.9365	FGFR3	DMC
-34.4234	GRB10	DMC			-34.4234	GRB10	DMC		49.4471	DSP	DMC
-34.2232	ACOX3	DMC			-34.2232	ACOX3	DMC		49.7105	TAB1	DMC
-34.0476	SHISAL1	DMC			-34.0476	SHISAL1	DMC		50.8271	TECR	DMC
-33.975	TRAPPC9	DMC			-33.975	TRAPPC9	DMC		51.123	TRMU	DMC
-33.9052	MYO16	DMC			-33.9052	MYO16	DMC		51.2601	TAB1	DMC
-33.8579	VAV2	DMC			-33.8579	VAV2	DMC		53.1294	SH3TC1	DMC
-33.8544	CELSR1	DMC			-33.8544	CELSR1	DMC		53.2913	TRAPPC9	DMC
-33.75	LTBR	DMC			-33.75	LTBR	DMC		54.1413	NRIP2	DMC
-33.3333	TRAPPC9	DMC			-33.3333	TRAPPC9	DMC		54.827	FAM234B	DMC
-33.0943	ABLIM2	DMC			-33.0943	ABLIM2	DMC		62.2924	TSPAN9	DMC
-33.0639	OBSCN	DMC			-33.0639	OBSCN	DMC		26.1714	THBS2	DMR
-32.8638	NACC2	DMC			-32.8638	NACC2	DMC		27.5163	IL17REL	DMR
-32.7407	XPO1	DMC			-32.7407	XPO1	DMC		27.6991	CELSR1	DMR
-32.4438	CSDC2	DMC			-32.4438	CSDC2	DMC		27.8333	NOS3	DMR
-32.4438	PMM1	DMC			-32.4438	PMM1	DMC		28.7686	GAK	DMR
-32.4011	TTC38	DMC			-32.4011	TTC38	DMC		31.0731	LRP1	DMR
-32	HTT	DMC			-32	HTT	DMC		31.0731	NXPH4	DMR
-32	MYDGF	DMC			-32	MYDGF	DMC		34.7924	CDH24	DMR
-31.8519	EHMT1	DMC			-31.8519	EHMT1	DMC		36.3799	HTT	DMR
-31.5991	TECR	DMC			-31.5991	TECR	DMC		39.2817	CARMIL3	DMR
-31.541	WNT7B	DMC			-31.541	WNT7B	DMC		40.5615	MAPK13	DMR
-31.0345	COL22A1	DMC			-31.0345	COL22A1	DMC		45.8716	PPARA	DMR
-30.9132	SIX6	DMC			-30.9132	SIX6	DMC		46.789	EHMT1	DMR
-30.8735	TECR	DMC			-30.8735	TECR	DMC		47.7822	DUOX2	DMR
-30.2042	ITPR3	DMC			-30.2042	ITPR3	DMC		47.7822	DUOXA2	DMR
-30	TAPT1	DMC			-30	TAPT1	DMC		49.6468	CELF5	DMR
-29.9924	ACOX3	DMC			-29.9924	ACOX3	DMC		50.4948	MDGA1	DMR
-29.6875	TJP3	DMC			-29.6875	TJP3	DMC		51.3497	CPT1B	DMR
-29.0108	PCDHA11	DMC			-29.0108	PCDHA11	DMC		52.3684	C13orf46	DMR
-28.9474	ZFAT	DMC			-28.9474	ZFAT	DMC		52.605	IFFO1	DMR
-28.7478	ATP6V1F	DMC			-28.7478	ATP6V1F	DMC		53.1136	TMPRSS9	DMR
-28.7478	FLNC	DMC			-28.7478	FLNC	DMC		53.2503	5S_rRNA	DMR
-27.5862	ITGA9	DMC			-27.5862	ITGA9	DMC		53.2503	NCAPG2	DMR
-27.4425	HTT	DMC			-27.4425	HTT	DMC		56.4459	TNFAIP8L1	DMR
-27.3864	COL5A1	DMC			-27.3864	COL5A1	DMC		60.3604	RIPK1	DMR
-27.3399	EGFL7	DMC			-27.3399	EGFL7	DMC		61.1084	GBGT1	DMR
-27.1825	TRAPPC9	DMC			-27.1825	TRAPPC9	DMC		64.2933	RBM33	DMR
-26.7606	ENPP2	DMC			-26.7606	ENPP2	DMC		72.0328	PTPRS	DMR
-26.4368	TTC38	DMC			-26.4368	TTC38	DMC
-26.2295	CELSR1	DMC			-26.2295	CELSR1	DMC
-25.3731	ATP6V1FNB	DMC			-25.3731	ATP6V1FNB	DMC
25.2528	ADCK1	DMC			-85.2317	ODC1	DMR
25.7143	HTT	DMC			-65.4491	RUBCNL	DMR
25.7143	LAMP1	DMC			-62.1359	HS1BP3	DMR
26.2295	PTP4A3	DMC			-61.8284	FER1L5	DMR
26.6667	COL14A1	DMC			-60.3697	ELOF1	DMR
26.7857	COL4A1	DMC			-57.0621	ASIC1	DMR
27.5505	5S_rRNA	DMC			-56.913	KCNS2	DMR
27.5505	TRAPPC9	DMC			-55.5954	CNOT11	DMR
27.6154	GMDS	DMC			-50.6667	TMEM63C	DMR
28.125	5S_rRNA	DMC			-40.2183	DAZAP1	DMR
28.2094	5S_rRNA	DMC			-33.3333	PTPA	DMR
28.2601	HTT	DMC			-32.4885	CYB5R3	DMR
28.4341	SRI	DMC			-29.3996	MCC	DMR
28.6102	TAPT1	DMC			-27.169	C1QL4	DMR
28.7364	UVSSA	DMC			-26.674	PWWP3A	DMR
29.0909	CUL9	DMC
29.0909	DNPH1	DMC
29.8419	CERK	DMC
29.955	HTT	DMC
30.1075	SH3TC1	DMC
30.2857	TRMT44	DMC
30.2985	CDYL	DMC
30.3553	CRLF2	DMC
30.3553	CRLF2	DMC
31.25	TRAPPC9	DMC
31.342	WDR46	DMC
31.4724	DUSP16	DMC
31.694	5S_rRNA	DMC
31.9056	VAV2	DMC
32.3051	TAPT1	DMC
32.437	KRT7	DMC
32.5	TAPT1	DMC
32.8358	EMG1	DMC
33.4737	COPE	DMC
33.7811	LINGO3	DMC
33.9286	MYDGF	DMC
34	SLC45A4	DMC
34.2365	TXNDC5	DMC
34.3414	VPS52	DMC
34.359	CACNA1I	DMC
34.3636	RASD2	DMC
34.6939	TAPT1	DMC
34.9842	IL17REL	DMC
35.0414	HTT	DMC
35.2941	GPR20	DMC
35.3125	ERMARD	DMC
35.3623	ITPR3	DMC
35.4391	TTC7B	DMC
35.8182	CHD7	DMC
35.9184	CELSR1	DMC
35.9358	TRAPPC9	DMC
36.0793	TRMU	DMC
36.0833	THBS2	DMC
36.0859	ITPR3	DMC
36.5747	THBS2	DMC
36.8116	ITPR3	DMC
36.9696	RPP40	DMC
37.4762	TTC7B	DMC
37.6119	SHANK3	DMC
37.6393	ARMC6	DMC
37.75	THBS2	DMC
37.8307	UNC93A	DMC
37.9221	THBS2	DMC
37.9874	THBS2	DMC
38.0057	PNPLA3	DMC
38.0952	CFAP77	DMC
38.1264	TTLL1	DMC
38.4572	ARFGAP3	DMC
38.6688	TSPAN9	DMC
38.75	5S_rRNA	DMC
38.8798	LRIG3	DMC
38.9227	MICAL3	DMC
39.2094	FGD2	DMC
39.3316	CRTC1	DMC
39.3316	U6	DMC
39.3557	MAP4K4	DMC
39.4029	PRMT8	DMC
39.8148	CLRN2	DMC
39.8333	THBS2	DMC
39.9351	ITPR3	DMC
40.0124	TAB1	DMC
40.6082	MPPED1	DMC
40.6265	HTT	DMC
40.6667	DHRSX	DMC
40.6751	PNPLA3	DMC
42.0099	CELSR1	DMC
42.9825	CACNA2D4	DMC
43.1597	TUBA8	DMC
43.6508	SORCS2	DMC
43.7992	CECR2	DMC
44.4219	SCUBE1	DMC
44.4691	HTT	DMC
45.149	ARHGEF40	DMC
45.2124	NRIP2	DMC
45.8917	FAM193A	DMC
45.9002	FGD2	DMC
45.9002	FGD2	DMC
46.25	TAB1	DMC
47.9365	FGFR3	DMC
49.4471	DSP	DMC
49.7105	TAB1	DMC
50.8271	TECR	DMC
51.123	TRMU	DMC
51.2601	TAB1	DMC
53.1294	SH3TC1	DMC
53.2913	TRAPPC9	DMC
54.1413	NRIP2	DMC
54.827	FAM234B	DMC
62.2924	TSPAN9	DMC
-85.2317	ODC1	DMR
-65.4491	RUBCNL	DMR
-62.1359	HS1BP3	DMR
-61.8284	FER1L5	DMR
-60.3697	ELOF1	DMR
-57.0621	ASIC1	DMR
-56.913	KCNS2	DMR
-55.5954	CNOT11	DMR
-50.6667	TMEM63C	DMR
-40.2183	DAZAP1	DMR
-33.3333	PTPA	DMR
-32.4885	CYB5R3	DMR
-29.3996	MCC	DMR
-27.169	C1QL4	DMR
-26.674	PWWP3A	DMR
26.1714	THBS2	DMR
27.5163	IL17REL	DMR
27.6991	CELSR1	DMR
27.8333	NOS3	DMR
28.7686	GAK	DMR
31.0731	LRP1	DMR
31.0731	NXPH4	DMR
34.7924	CDH24	DMR
36.3799	HTT	DMR
39.2817	CARMIL3	DMR
40.5615	MAPK13	DMR
45.8716	PPARA	DMR
46.789	EHMT1	DMR
47.7822	DUOX2	DMR
47.7822	DUOXA2	DMR
49.6468	CELF5	DMR
50.4948	MDGA1	DMR
51.3497	CPT1B	DMR
52.3684	C13orf46	DMR
52.605	IFFO1	DMR
53.1136	TMPRSS9	DMR
53.2503	5S_rRNA	DMR
53.2503	NCAPG2	DMR
56.4459	TNFAIP8L1	DMR
60.3604	RIPK1	DMR
61.1084	GBGT1	DMR
64.2933	RBM33	DMR
72.0328	PTPRS	DMR

## Sheet: gProfiler_Output
source	term_name	term_id	term_size	effective_domain_size	p_adj_color	adjusted_p_value__Differentially Methylated Genes	query_size__Differentially Methylated Genes	intersection_size__Differentially Methylated Genes
TF	Factor: AP-2; motif: GSCCSCRGGCNRNRNN; match class: 1	TF:M00800_1	4257	19940	4.4404e-07	4.4404e-07	178	76
TF	Factor: E2F-3; motif: GGCGGGN; match class: 1	TF:M02089_1	9383	19940	0.000123218	0.000123218	178	120
TF	Factor: SP2; motif: GGGCGGGAC	TF:M01783	9207	19940	0.000426022	0.000426022	178	117
TF	Factor: SP2; motif: GGGCGGGAC; match class: 0	TF:M01783_0	9207	19940	0.000426022	0.000426022	178	117
TF	Factor: CNOT3; motif: GGCCGCGSSS	TF:M01253	3604	19940	0.000673943	0.000673943	178	61
TF	Factor: CNOT3; motif: GGCCGCGSSS; match class: 0	TF:M01253_0	3604	19940	0.000673943	0.000673943	178	61
TF	Factor: PAX5; motif: RNGCGTGACCNN; match class: 1	TF:M09817_1	6201	19940	0.000954093	0.000954093	178	88
TF	Factor: BTEB1; motif: GGGGGCGGGGCNGSGGGNGS; match class: 1	TF:M09723_1	5982	19940	0.00182975	0.00182975	178	85
TF	Factor: Sp1; motif: GGGGCGGGGC; match class: 1	TF:M00931_1	5898	19940	0.00207444	0.00207444	178	84
TF	Factor: CPBP; motif: GNNRGGGHGGGGNNGGGRN; match class: 1	TF:M09973_1	6624	19940	0.00234312	0.00234312	178	91
TF	Factor: ZNF37A; motif: CCYYGGCTCCNTSCCMN; match class: 1	TF:M12354_1	5627	19940	0.00256445	0.00256445	178	81
TF	Factor: Sp2; motif: TGGGCGCGCCCA	TF:M06948	8899	19940	0.0026204	0.0026204	178	112
TF	Factor: Sp2; motif: TGGGCGCGCCCA; match class: 0	TF:M06948_0	8899	19940	0.0026204	0.0026204	178	112
TF	Factor: KLF3; motif: NNNNNNGGGCGGGGCNNGN	TF:M09970	7756	19940	0.00413409	0.00413409	178	101
TF	Factor: KLF3; motif: NNNNNNGGGCGGGGCNNGN; match class: 0	TF:M09970_0	7756	19940	0.00413409	0.00413409	178	101
TF	Factor: SP1; motif: GGGGYGGGGNS; match class: 1	TF:M01303_1	3530	19940	0.00438625	0.00438625	178	58
TF	Factor: ZNF586; motif: CAGGCCYRGAGG; match class: 1	TF:M10491_1	7765	19940	0.0044005	0.0044005	178	101
TF	Factor: E2F-1:TBR2; motif: NGGTGNNANGGCGCNNTNNCRNNN; match class: 1	TF:M08523_1	7447	19940	0.00449519	0.00449519	178	98
TF	Factor: BTEB3; motif: CCNNSCCNSCCCCKCCCCC; match class: 1	TF:M09826_1	7663	19940	0.00457003	0.00457003	178	100
TF	Factor: Sp1; motif: NNGGGGCGGGGNN; match class: 1	TF:M00932_1	6044	19940	0.00630664	0.00630664	178	84
TF	Factor: Sp2; motif: NYSGCCCCGCCCCCY; match class: 1	TF:M03567_1	3618	19940	0.00990496	0.00990496	178	58
TF	Factor: HIC1; motif: NNNGGKTGCCCSNNNNNN	TF:M01073	4105	19940	0.0129836	0.0129836	178	63
TF	Factor: HIC1; motif: NNNGGKTGCCCSNNNNNN; match class: 0	TF:M01073_0	4105	19940	0.0129836	0.0129836	178	63
TF	Factor: RNF96; motif: BCCCGCRGCC; match class: 1	TF:M01199_1	4299	19940	0.0138733	0.0138733	178	65
TF	Factor: GCMa:Erg; motif: ATGCGGGCGGAARKG; match class: 1	TF:M08487_1	8820	19940	0.0143451	0.0143451	178	109
TF	Factor: HDAC1; motif: KGCARGGTC; match class: 1	TF:M07041_1	6404	19940	0.0193552	0.0193552	178	86
TF	Factor: KLF3; motif: NNNNNNGGGCGGGGCNNGN; match class: 1	TF:M09970_1	3795	19940	0.0211623	0.0211623	178	59
TF	Factor: HIC1; motif: NSNNNNTGCCCSSNN; match class: 0	TF:M01072_0	4172	19940	0.0226213	0.0226213	178	63
TF	Factor: HIC1; motif: NSNNNNTGCCCSSNN	TF:M01072	4172	19940	0.0226213	0.0226213	178	63
TF	Factor: Sp1; motif: NGGGGCGGGGN; match class: 1	TF:M07395_1	6340	19940	0.0252165	0.0252165	178	85
TF	Factor: p53; motif: RGRCWWGYCYNGRCWWGYYY; match class: 0	TF:M01652_0	8156	19940	0.0285597	0.0285597	178	102
TF	Factor: p53; motif: RGRCWWGYCYNGRCWWGYYY	TF:M01652	8156	19940	0.0285597	0.0285597	178	102
TF	Factor: Sp2; motif: NYSGCCCCGCCCCCY; match class: 0	TF:M03567_0	7725	19940	0.028955	0.028955	178	98
TF	Factor: Sp2; motif: NYSGCCCCGCCCCCY	TF:M03567	7725	19940	0.028955	0.028955	178	98
TF	Factor: LRF; motif: GGGGKYNNB; match class: 1	TF:M01100_1	2771	19940	0.0300992	0.0300992	178	47
TF	Factor: N-Myc; motif: NGCCACGTGSNN; match class: 1	TF:M09991_1	326	19940	0.0322333	0.0322333	178	13
TF	Factor: ZNF511; motif: GGRRGRGGCWGNG; match class: 1	TF:M09738_1	4790	19940	0.033352	0.033352	178	69
TF	Factor: NF-kappaB; motif: GGGGATYCCC; match class: 1	TF:M00051_1	2782	19940	0.0334945	0.0334945	178	47
TF	Factor: RUNX3; motif: NRACCGCAAACCGCAN	TF:M04109	9872	19940	0.034994	0.034994	178	117
TF	Factor: RUNX3; motif: NRACCGCAAACCGCAN; match class: 0	TF:M04109_0	9872	19940	0.034994	0.034994	178	117
TF	Factor: TIEG1; motif: NCCCNSNCCCCGCCCCC; match class: 1	TF:M12351_1	8212	19940	0.0405422	0.0405422	178	102
TF	Factor: Sp1; motif: GGGGCGGGGC; match class: 1	TF:M07063_1	3508	19940	0.0405678	0.0405678	178	55
TF	Factor: Sp2; motif: GGGGCGGGG; match class: 1	TF:M10435_1	3508	19940	0.0405678	0.0405678	178	55
TF	Factor: ZXDB; motif: NGGGGTC; match class: 1	TF:M06191_1	1282	19940	0.0407562	0.0407562	178	28
TF	Factor: ZXDA; motif: NGGGGTC; match class: 1	TF:M06190_1	1282	19940	0.0407562	0.0407562	178	28
TF	Factor: Sp1; motif: NGGGGGCGGGGYN; match class: 1	TF:M00196_1	5919	19940	0.0457649	0.0457649	178	80
TF	Factor: EGR1; motif: NACGCCCACGCANW	TF:M03896	6130	19940	0.0484163	0.0484163	178	82
TF	Factor: EGR1; motif: NACGCCCACGCANW; match class: 0	TF:M03896_0	6130	19940	0.0484163	0.0484163	178	82
TF	Factor: BTEB2; motif: RGGGNGKGGN; match class: 1	TF:M07277_1	4168	19940	0.0955933	0.0955933	178	61
HP	Childhood onset short-limb short stature	HP:0011405	2	4232	0.0981337	0.0981337	42	2
WP	MAPK Signaling Pathway	WP:WP382	246	6954	0.15189	0.15189	75	9
KEGG	MAPK signaling pathway	KEGG:04010	294	7747	0.183954	0.183954	76	9

## Sheet: MeSH
Rank	Mesh	Mesh Category	All Genes	Genes From Input - No Duplicates	Score (lower, better)	P Value (non-aggregated)	Hypomethylated	Hypermethylated
1	Disease	(C) - Diseases	11975	117	2.1972	0.000801735	75	56
5	Genetic Predisposition to Disease	(C) - Diseases	14767	116	2.2956	8.06394e-27	71	61
6	Neoplasms	(C) - Diseases	11509	102	2.2991	3.84523e-06	60	54
4	Breast Neoplasms	(C) - Diseases	9907	96	2.2867	0.00371238	59	48
2	Amyotrophic Lateral Sclerosis	(C) - Diseases	8359	90	2.2689	0.0497141	57	47
3	Prostatic Neoplasms	(C) - Diseases	6174	76	2.2842	0.0365985	46	41
12	Disease Progression	(C) - Diseases	6961	61	2.5273	0.00189039	35	32
10	Liver Neoplasms	(C) - Diseases	5889	59	2.4836	0.033339	37	29
11	Lung Neoplasms	(C) - Diseases	6181	58	2.5195	0.0127022	33	30
9	Carcinoma, Hepatocellular	(C) - Diseases	5490	57	2.4831	0.0481869	36	27
17	Neoplasm Invasiveness	(C) - Diseases	5777	51	2.6018	0.0055846	33	28
7	Tobacco Use Disorder	(C) - Diseases	3460	50	2.3964	0.00984276	34	27
16	Cell Transformation, Neoplastic	(C) - Diseases	5344	50	2.5852	0.0175432	30	29
20	Colorectal Neoplasms	(C) - Diseases	5507	49	2.6158	0.0076562	29	27
27	Neoplasm Metastasis	(C) - Diseases	5218	46	2.6473	0.00794905	31	21
24	Adenocarcinoma	(C) - Diseases	4624	44	2.6334	0.0279712	27	24
30	Alzheimer Disease	(C) - Diseases	5059	44	2.6724	0.00717104	27	21
26	Stomach Neoplasms	(C) - Diseases	4343	42	2.6466	0.0353879	22	26
29	Multiple Sclerosis	(C) - Diseases	4165	40	2.6708	0.0352898	27	18
31	Carcinoma, Squamous Cell	(C) - Diseases	4213	40	2.6757	0.0315557	23	23
28	Parkinson Disease	(C) - Diseases	3899	39	2.6641	0.049997	24	21
34	Diabetes Mellitus, Type 2	(C) - Diseases	4160	39	2.6922	0.0287436	22	20
37	Carcinogenesis	(C) - Diseases	3844	36	2.7275	0.0321228	19	22
41	Colonic Neoplasms	(C) - Diseases	3575	34	2.7456	0.0397155	21	18
47	Ovarian Neoplasms	(C) - Diseases	3621	33	2.7771	0.0281119	18	20
21	Dwarfism	(C) - Diseases	2349	32	2.6159	0.0403336	23	16
51	Glioblastoma	(C) - Diseases	3523	32	2.7919	0.0286126	18	19
61	Brain Neoplasms	(C) - Diseases	4052	32	2.8526	0.00404843	16	18
25	Muscle Hypotonia	(C) - Diseases	2304	31	2.635	0.0451814	22	16
56	Carcinoma, Non-Small-Cell Lung	(C) - Diseases	3487	31	2.815	0.0242689	18	17
58	Pancreatic Neoplasms	(C) - Diseases	3137	29	2.827	0.0386588	14	17
59	Lymphatic Metastasis	(C) - Diseases	3068	28	2.8478	0.0365595	17	13
65	Glioma	(C) - Diseases	2695	25	2.89	0.0474337	16	12
80	Uterine Cervical Neoplasms	(C) - Diseases	3051	25	2.9438	0.0155726	11	18
86	Esophageal Neoplasms	(C) - Diseases	2649	23	2.9549	0.0326258	12	13
91	Carcinoma	(C) - Diseases	2724	23	2.967	0.0255395	14	11
106	Leukemia, Myeloid, Acute	(C) - Diseases	2243	20	3.004	0.0479831	14	9
39	Fibrosis	(C) - Diseases	1095	19	2.7372	0.0175949	12	8
48	Stroke	(C) - Diseases	1208	19	2.7798	0.0336665	10	13
132	Urinary Bladder Neoplasms	(C) - Diseases	2141	18	3.0753	0.0375362	11	9
144	Osteosarcoma	(C) - Diseases	2037	17	3.1034	0.038931	8	11
177	Kidney Neoplasms	(C) - Diseases	2141	16	3.1776	0.0178585	8	9
169	Genomic Instability	(C) - Diseases	1811	15	3.161	0.0445993	10	8
239	Neoplasm Recurrence, Local	(C) - Diseases	2385	15	3.2806	0.00296643	8	9
69	Limb Deformities, Congenital	(C) - Diseases	754	13	2.9048	0.0380437	9	5
210	Lymphoma, Large B-Cell, Diffuse	(C) - Diseases	1681	13	3.253	0.0360112	6	10
217	Head and Neck Neoplasms	(C) - Diseases	1712	13	3.2609	0.0317588	6	10
221	Chromosome Deletion	(C) - Diseases	1727	13	3.2647	0.0298306	9	7
35	Cerebral Hemorrhage	(C) - Diseases	352	11	2.719	0.00151482	6	9
275	Asthma	(C) - Diseases	1493	11	3.3465	0.0352703	8	5
313	Mouth Neoplasms	(C) - Diseases	1701	11	3.4032	0.0127725	6	7
36	Subarachnoid Hemorrhage	(C) - Diseases	293	10	2.7221	0.00131288	6	9
50	Glaucoma	(C) - Diseases	344	10	2.7918	0.00383536	7	5
96	Cardiomyopathy, Dilated	(C) - Diseases	526	10	2.9763	0.0380209	6	5
344	Precursor Cell Lymphoblastic Leukemia-Lymphoma	(C) - Diseases	1514	10	3.4354	0.0198136	5	6
375	Acute Disease	(C) - Diseases	1372	9	3.4841	0.0242624	6	5
380	Hematologic Neoplasms	(C) - Diseases	1382	9	3.4873	0.0230313	7	4
382	Lupus Erythematosus, Systemic	(C) - Diseases	1387	9	3.4889	0.0224347	4	7
101	Diseases in Twins	(C) - Diseases	345	8	2.9869	0.0253153	5	5
111	Vascular Remodeling	(C) - Diseases	370	8	3.0173	0.0337923	5	4
113	Ventricular Remodeling	(C) - Diseases	381	8	3.03	0.037904	3	7
124	Neuronal Ceroid-Lipofuscinoses	(C) - Diseases	401	8	3.0522	0.0459	4	5
404	Autoimmune Diseases	(C) - Diseases	1166	8	3.5158	0.0410031	6	5
57	Cholestasis	(C) - Diseases	178	7	2.8155	0.00311837	3	5
73	Intracranial Hemorrhages	(C) - Diseases	232	7	2.9306	0.0113062	4	6
81	Cardiomyopathy, Hypertrophic	(C) - Diseases	240	7	2.9453	0.0131637	5	3
100	Adrenal Cortex Neoplasms	(C) - Diseases	264	7	2.9867	0.0198385	5	4
118	Fetal Diseases	(C) - Diseases	297	7	3.0378	0.0316869	5	4
60	Liver Cirrhosis, Alcoholic	(C) - Diseases	141	6	2.8482	0.00414835	3	3
95	Scoliosis	(C) - Diseases	189	6	2.9754	0.0145551	5	2
105	Varicose Veins	(C) - Diseases	201	6	3.0022	0.0185279	4	3
108	Osteochondrodysplasias	(C) - Diseases	205	6	3.0107	0.0199791	4	5
139	Hypertriglyceridemia	(C) - Diseases	247	6	3.0917	0.0388518	2	4
526	Carcinoma, Papillary	(C) - Diseases	1012	6	3.7042	0.0317167	4	4
537	Bartter Syndrome	(C) - Diseases	1042	6	3.7168	0.0266261	3	4
538	Nasopharyngeal Neoplasms	(C) - Diseases	1045	6	3.7181	0.026156	3	4
554	Neoplasms, Glandular and Epithelial	(C) - Diseases	1113	6	3.7455	0.0172119	4	2
591	Endometrial Neoplasms	(C) - Diseases	1290	6	3.8096	0.00515266	2	4
121	Chromosome Duplication	(C) - Diseases	154	5	3.0449	0.0222037	5	2
133	Pediatric Obesity	(C) - Diseases	166	5	3.0774	0.0284148	1	4
14	Achondroplasia	(C) - Diseases	31	4	2.5425	0.000361569	4	0
40	Rupture	(C) - Diseases	49	4	2.7413	0.00199417	3	2
52	Fabry Disease	(C) - Diseases	56	4	2.7993	0.00319855	1	3
71	Tendinopathy	(C) - Diseases	75	4	2.9262	0.00857111	2	2
79	Joint Diseases	(C) - Diseases	78	4	2.9432	0.00972901	3	1
90	Anophthalmos	(C) - Diseases	82	4	2.965	0.0114107	2	2
115	Osteonecrosis	(C) - Diseases	96	4	3.0334	0.018547	3	1
145	Liver Diseases, Alcoholic	(C) - Diseases	114	4	3.1081	0.0304898	0	4
160	Aortic Aneurysm, Thoracic	(C) - Diseases	124	4	3.1446	0.0383447	1	3
164	Liposarcoma	(C) - Diseases	126	4	3.1515	0.040009	2	3
165	Hyperlipoproteinemia Type II	(C) - Diseases	126	4	3.1515	0.040009	1	3
639	Herpes Simplex	(C) - Diseases	737	4	3.9186	0.0468495	2	2
657	Diabetic Nephropathies	(C) - Diseases	815	4	3.9623	0.0283086	1	3
669	Carcinoma, Ovarian Epithelial	(C) - Diseases	922	4	4.0159	0.0132717	3	1
70	Hepatitis E	(C) - Diseases	41	3	2.9138	0.00977669	0	3
77	Tonsillar Neoplasms	(C) - Diseases	43	3	2.9345	0.0110687	2	2
103	Cardiomyopathy, Hypertrophic, Familial	(C) - Diseases	50	3	3	0.0162587	2	2
110	Aneurysm	(C) - Diseases	52	3	3.017	0.0179279	0	3
131	Anterior Cruciate Ligament Injuries	(C) - Diseases	59	3	3.0719	0.0243897	3	0
134	Bowen's Disease	(C) - Diseases	60	3	3.0792	0.0253883	2	0
149	Keratoderma, Palmoplantar	(C) - Diseases	65	3	3.1139	0.0306468	3	2
150	Hepatitis, Viral, Human	(C) - Diseases	65	3	3.1139	0.0306468	2	1
155	Pigmentation Disorders	(C) - Diseases	66	3	3.1206	0.0317496	3	0
166	Anemia, Hemolytic	(C) - Diseases	71	3	3.1523	0.0375013	1	2
167	Essential Tremor	(C) - Diseases	71	3	3.1523	0.0375013	2	1
172	Speech Disorders	(C) - Diseases	74	3	3.1703	0.041131	2	3
185	Migraine without Aura	(C) - Diseases	79	3	3.1987	0.0474485	1	2
680	Thyroid Cancer, Papillary	(C) - Diseases	650	3	4.1139	0.0410441	2	2
683	Osteoporosis	(C) - Diseases	668	3	4.1258	0.0361559	2	1
689	Myelodysplastic Syndromes	(C) - Diseases	709	3	4.1517	0.0268455	3	0
693	Sepsis	(C) - Diseases	724	3	4.1608	0.0240052	0	3
705	Seminoma	(C) - Diseases	839	3	4.2248	0.00973551	0	3
707	Endometriosis	(C) - Diseases	853	3	4.232	0.00867987	1	2
18	Chylothorax	(C) - Diseases	9	2	2.6075	0.00418981	1	1
19	Wolf-Hirschhorn Syndrome	(C) - Diseases	9	2	2.6075	0.00418981	2	0
38	Gastroschisis	(C) - Diseases	12	2	2.7324	0.00742764	1	1
53	Retinal Hemorrhage	(C) - Diseases	14	2	2.7993	0.0100144	0	2
54	Labyrinth Diseases	(C) - Diseases	14	2	2.7993	0.0100144	0	2
75	Multicystic Dysplastic Kidney	(C) - Diseases	19	2	2.932	0.0177935	2	2
84	Hypertension, Renovascular	(C) - Diseases	20	2	2.9542	0.0195503	0	2
85	Iris Diseases	(C) - Diseases	20	2	2.9542	0.0195503	2	0
94	Isolated Noncompaction of the Ventricular Myocardium	(C) - Diseases	21	2	2.9754	0.0213675	2	0
102	Tendon Injuries	(C) - Diseases	22	2	2.9956	0.0232425	2	0
109	Alagille Syndrome	(C) - Diseases	23	2	3.0149	0.0251725	1	1
116	Darier Disease	(C) - Diseases	24	2	3.0334	0.0271549	0	2
128	Wolfram Syndrome	(C) - Diseases	26	2	3.0682	0.0312673	2	0
129	Adenolymphoma	(C) - Diseases	26	2	3.0682	0.0312673	1	1
136	Jaundice	(C) - Diseases	27	2	3.0846	0.0333924	1	1
153	Silver-Russell Syndrome	(C) - Diseases	29	2	3.1156	0.0377688	2	0
154	Lacrimal Apparatus Diseases	(C) - Diseases	29	2	3.1156	0.0377688	0	2
161	Focal Nodular Hyperplasia	(C) - Diseases	31	2	3.1446	0.0422984	1	1
162	Heat Stress Disorders	(C) - Diseases	31	2	3.1446	0.0422984	0	2
173	Distal Myopathies	(C) - Diseases	33	2	3.1717	0.0469644	2	0
174	Anemia, Hemolytic, Congenital	(C) - Diseases	33	2	3.1717	0.0469644	2	0
175	Hypoplastic Left Heart Syndrome	(C) - Diseases	33	2	3.1717	0.0469644	0	2
176	Sick Sinus Syndrome	(C) - Diseases	33	2	3.1717	0.0469644	1	1
179	Knee Injuries	(C) - Diseases	34	2	3.1847	0.0493434	2	0
718	Adenocarcinoma, Mucinous	(C) - Diseases	514	2	4.3642	0.0491147	1	1
719	Chromosome Breakage	(C) - Diseases	561	2	4.4022	0.0339587	0	2
1	Proteome	(D) - Chemicals and Drugs	16440	154	2.0961	8.1453e-08	95	78
5	DNA Primers	(D) - Chemicals and Drugs	15912	138	2.1772	1.31721e-59	85	70
10	Transcription Factors	(D) - Chemicals and Drugs	14479	126	2.2153	5.00616e-15	81	61
6	Membrane Proteins	(D) - Chemicals and Drugs	12076	120	2.1788	0.0017977	74	61
4	RNA, Small Interfering	(D) - Chemicals and Drugs	11383	118	2.1678	0.0164966	74	58
7	Carrier Proteins	(D) - Chemicals and Drugs	11425	116	2.1842	0.00786984	70	57
12	Recombinant Proteins	(D) - Chemicals and Drugs	10766	105	2.2449	0.00249812	70	50
15	Nuclear Proteins	(D) - Chemicals and Drugs	10808	104	2.255	0.00135383	67	51
19	DNA-Binding Proteins	(D) - Chemicals and Drugs	11611	102	2.3029	1.55753e-06	64	52
14	Recombinant Fusion Proteins	(D) - Chemicals and Drugs	9223	97	2.2466	0.0355459	66	45
16	Neoplasm Proteins	(D) - Chemicals and Drugs	9286	96	2.2586	0.0263692	57	50
17	Ubiquitin-Protein Ligases	(D) - Chemicals and Drugs	9481	96	2.2676	0.0162154	57	51
22	Protein-Serine-Threonine Kinases	(D) - Chemicals and Drugs	9069	89	2.3141	0.00872941	52	48
21	Repressor Proteins	(D) - Chemicals and Drugs	8715	88	2.3066	0.0191549	56	44
45	DNA	(D) - Chemicals and Drugs	11932	87	2.4529	2.30676e-14	59	42
23	Peptides	(D) - Chemicals and Drugs	7581	81	2.318	0.0487784	52	35
29	RNA-Binding Proteins	(D) - Chemicals and Drugs	8740	81	2.3798	0.00203813	51	43
50	RNA	(D) - Chemicals and Drugs	9412	76	2.4673	2.37397e-06	46	41
43	Biomarkers, Tumor	(D) - Chemicals and Drugs	8692	75	2.4443	0.000173559	44	45
35	Cell Cycle Proteins	(D) - Chemicals and Drugs	7161	71	2.4077	0.0214085	48	32
41	Protein Isoforms	(D) - Chemicals and Drugs	7681	71	2.4382	0.00411115	44	34
37	Ubiquitin	(D) - Chemicals and Drugs	7126	70	2.4179	0.0186658	45	33
24	Antigens, CD	(D) - Chemicals and Drugs	5202	66	2.3324	0.03073	43	33
20	Ribonucleoproteins	(D) - Chemicals and Drugs	4325	62	2.3065	0.00563313	38	31
42	NF-kappa B	(D) - Chemicals and Drugs	5913	62	2.4423	0.0489782	40	31
56	Tumor Suppressor Proteins	(D) - Chemicals and Drugs	6783	61	2.516	0.00399674	40	31
57	Proto-Oncogene Proteins	(D) - Chemicals and Drugs	6461	59	2.5239	0.00676599	35	34
88	MicroRNAs	(D) - Chemicals and Drugs	8082	59	2.6211	5.41725e-07	34	32
54	Peptide Fragments	(D) - Chemicals and Drugs	5777	57	2.5052	0.0290326	37	27
55	Biomarkers	(D) - Chemicals and Drugs	5713	56	2.5158	0.0274199	34	30
36	RNA, Neoplasm	(D) - Chemicals and Drugs	4226	54	2.4164	0.0362457	37	24
65	Trans-Activators	(D) - Chemicals and Drugs	5419	52	2.5572	0.0233958	29	30
28	Delayed-Action Preparations	(D) - Chemicals and Drugs	3189	49	2.3785	0.00407438	34	26
30	Carbon Monoxide	(D) - Chemicals and Drugs	3257	49	2.3877	0.00572929	34	26
34	Nicotine	(D) - Chemicals and Drugs	3346	49	2.3994	0.00861418	34	26
63	Epidermal Growth Factor	(D) - Chemicals and Drugs	4773	49	2.5537	0.0496044	32	25
70	Tumor Suppressor Protein p53	(D) - Chemicals and Drugs	5017	49	2.5753	0.0319348	30	25
78	Lysine	(D) - Chemicals and Drugs	5290	49	2.5983	0.0157195	29	28
38	Extracellular Signal-Regulated MAP Kinases	(D) - Chemicals and Drugs	3415	48	2.4262	0.0157653	34	21
49	Actins	(D) - Chemicals and Drugs	3699	48	2.4609	0.0361978	31	23
47	Amino Acids	(D) - Chemicals and Drugs	3525	47	2.4582	0.0291516	31	23
72	Antigens, Neoplasm	(D) - Chemicals and Drugs	4666	47	2.58	0.044667	25	30
126	Genetic Markers	(D) - Chemicals and Drugs	6198	47	2.7033	0.000106978	32	23
132	Histones	(D) - Chemicals and Drugs	6008	46	2.7085	0.000186717	33	20
27	Cell Adhesion Molecules	(D) - Chemicals and Drugs	2624	45	2.3678	0.000872217	26	28
46	Microfilament Proteins	(D) - Chemicals and Drugs	3226	45	2.4575	0.0196877	31	20
52	Antibodies	(D) - Chemicals and Drugs	3437	44	2.5045	0.0438927	28	23
117	3' Untranslated Regions	(D) - Chemicals and Drugs	5161	44	2.6811	0.00480797	28	24
105	Cytokines	(D) - Chemicals and Drugs	4451	42	2.6572	0.0274051	24	25
118	Glycoproteins	(D) - Chemicals and Drugs	4486	41	2.6816	0.0193517	24	25
144	Antineoplastic Agents	(D) - Chemicals and Drugs	4841	40	2.7361	0.00375018	24	21
112	Tumor Necrosis Factor-alpha	(D) - Chemicals and Drugs	3963	39	2.6712	0.0446095	21	22
124	Saccharomyces cerevisiae Proteins	(D) - Chemicals and Drugs	4175	39	2.6938	0.0276499	27	17
146	Homeodomain Proteins	(D) - Chemicals and Drugs	3962	36	2.7406	0.0233344	27	15
68	Cysteine	(D) - Chemicals and Drugs	2386	34	2.57	0.026384	20	22
149	Antibodies, Neoplasm	(D) - Chemicals and Drugs	3586	34	2.7469	0.0387297	23	13
179	Proto-Oncogene Proteins c-myc	(D) - Chemicals and Drugs	3537	32	2.7936	0.0274997	19	16
94	Phosphoric Monoester Hydrolases	(D) - Chemicals and Drugs	2213	30	2.646	0.0447312	17	16
189	Antigens, Surface	(D) - Chemicals and Drugs	3282	30	2.8172	0.0335647	14	18
77	Fibronectins	(D) - Chemicals and Drugs	1832	29	2.5934	0.0139697	21	13
99	Mixed Function Oxygenases	(D) - Chemicals and Drugs	2098	29	2.6523	0.0412495	14	19
234	Viral Proteins	(D) - Chemicals and Drugs	3450	29	2.8683	0.0146257	18	16
115	Transcription Factor AP-1	(D) - Chemicals and Drugs	2072	28	2.6773	0.0489468	15	16
210	BRCA1 Protein	(D) - Chemicals and Drugs	2989	28	2.8365	0.0445398	21	12
213	Hydrogen Peroxide	(D) - Chemicals and Drugs	3016	28	2.8404	0.0417505	16	14
26	Calcium Channels	(D) - Chemicals and Drugs	893	27	2.3434	1.73917e-06	14	16
121	Insulin-Like Growth Factor I	(D) - Chemicals and Drugs	1976	27	2.6883	0.0478256	18	16
250	ELAV-Like Protein 1	(D) - Chemicals and Drugs	3105	27	2.8846	0.0250398	18	12
305	Isoenzymes	(D) - Chemicals and Drugs	3534	27	2.9408	0.0045746	16	15
312	Chromosomal Proteins, Non-Histone	(D) - Chemicals and Drugs	3577	27	2.9461	0.00372973	19	11
93	JNK Mitogen-Activated Protein Kinases	(D) - Chemicals and Drugs	1660	26	2.6454	0.0196152	14	15
98	GTPase-Activating Proteins	(D) - Chemicals and Drugs	1685	26	2.6519	0.0221476	17	15
271	TOR Serine-Threonine Kinases	(D) - Chemicals and Drugs	3027	26	2.9063	0.0238005	14	17
254	DNA, Neoplasm	(D) - Chemicals and Drugs	2704	25	2.8914	0.0464121	14	14
274	Protein Kinase Inhibitors	(D) - Chemicals and Drugs	2807	25	2.9076	0.0352965	14	14
134	Hypoxia-Inducible Factor-Proline Dioxygenases	(D) - Chemicals and Drugs	1658	24	2.7144	0.0393809	12	15
276	Protein Sorting Signals	(D) - Chemicals and Drugs	2596	24	2.9092	0.0485888	17	10
288	Histone Deacetylases	(D) - Chemicals and Drugs	2696	24	2.9256	0.0373178	16	12
321	Oligonucleotides	(D) - Chemicals and Drugs	2853	24	2.9502	0.0226632	20	8
333	RNA Precursors	(D) - Chemicals and Drugs	2892	24	2.956	0.0197212	16	10
127	Alanine	(D) - Chemicals and Drugs	1485	23	2.7035	0.0270029	11	17
138	Amino Acids, Dicarboxylic	(D) - Chemicals and Drugs	1573	23	2.7285	0.0392422	12	14
143	Mitogen-Activated Protein Kinase 6	(D) - Chemicals and Drugs	1600	23	2.7359	0.0433032	12	14
298	Protein Kinase C	(D) - Chemicals and Drugs	2521	23	2.9334	0.0468959	12	14
313	Phosphotyrosine	(D) - Chemicals and Drugs	2597	23	2.9463	0.0381333	13	14
345	Multienzyme Complexes	(D) - Chemicals and Drugs	2501	22	2.9685	0.03863	12	12
128	Cation Transport Proteins	(D) - Chemicals and Drugs	1242	21	2.705	0.0169721	11	13
137	Mitogen-Activated Protein Kinase Kinases	(D) - Chemicals and Drugs	1307	21	2.7271	0.0246721	8	15
158	Receptor, Insulin	(D) - Chemicals and Drugs	1423	21	2.764	0.0419915	13	12
406	tat Gene Products, Human Immunodeficiency Virus	(D) - Chemicals and Drugs	2553	21	3.0179	0.0239344	11	14
411	Dactinomycin	(D) - Chemicals and Drugs	2573	21	3.0213	0.0222373	14	10
524	Pyrimidines	(D) - Chemicals and Drugs	3039	21	3.0936	0.00261091	16	11
110	Dynactin Complex	(D) - Chemicals and Drugs	1036	20	2.6686	0.00638125	11	13
116	Phosphoserine	(D) - Chemicals and Drugs	1065	20	2.6806	0.0081542	15	9
145	Zebrafish Proteins	(D) - Chemicals and Drugs	1219	20	2.7392	0.0234562	14	7
174	Imidazoles	(D) - Chemicals and Drugs	1360	20	2.7868	0.0455394	10	14
439	Receptors, Estrogen	(D) - Chemicals and Drugs	2454	20	3.0431	0.0242574	13	10
477	RNA Polymerase II	(D) - Chemicals and Drugs	2606	20	3.0692	0.0131833	11	10
176	Glycine	(D) - Chemicals and Drugs	1237	19	2.7901	0.0385871	12	12
183	Adaptor Proteins, Vesicular Transport	(D) - Chemicals and Drugs	1284	19	2.8063	0.0470104	11	12
428	Receptors, Steroid	(D) - Chemicals and Drugs	2185	19	3.0372	0.0436948	10	11
429	Polycomb Repressive Complex 1	(D) - Chemicals and Drugs	2186	19	3.0374	0.0435642	14	11
432	Polycomb Repressive Complex 2	(D) - Chemicals and Drugs	2195	19	3.0392	0.0423972	14	9
485	DNA Helicases	(D) - Chemicals and Drugs	2370	19	3.0725	0.0232027	13	11
576	PTEN Phosphohydrolase	(D) - Chemicals and Drugs	2689	19	3.1274	0.00556487	7	14
129	Fatty Acids	(D) - Chemicals and Drugs	915	18	2.7061	0.00765948	11	11
139	Rho Guanine Nucleotide Exchange Factors	(D) - Chemicals and Drugs	966	18	2.7297	0.011818	10	11
462	Glycogen Synthase Kinase 3 beta	(D) - Chemicals and Drugs	2068	18	3.0603	0.0471987	11	10
557	Checkpoint Kinase 2	(D) - Chemicals and Drugs	2356	18	3.1169	0.016552	13	8
565	Fungal Proteins	(D) - Chemicals and Drugs	2379	18	3.1211	0.0149852	13	6
141	Histone Demethylases	(D) - Chemicals and Drugs	865	17	2.7314	0.00921967	10	11
170	Methionine	(D) - Chemicals and Drugs	975	17	2.7834	0.0217344	6	14
182	Cyclooxygenase 2	(D) - Chemicals and Drugs	1025	17	2.8051	0.029656	10	8
649	14-3-3 Proteins	(D) - Chemicals and Drugs	2398	17	3.1742	0.00859019	10	10
774	Cyclin-Dependent Kinases	(D) - Chemicals and Drugs	2843	17	3.2482	0.000669252	13	6
152	Platelet-Derived Growth Factor	(D) - Chemicals and Drugs	809	16	2.755	0.0105162	10	11
192	Integrin alpha5beta1	(D) - Chemicals and Drugs	937	16	2.8188	0.0278913	11	5
162	Monomeric GTP-Binding Proteins	(D) - Chemicals and Drugs	730	15	2.7664	0.00963141	9	8
169	Calmodulin	(D) - Chemicals and Drugs	753	15	2.7799	0.0119979	11	7
200	MAP Kinase Kinase 4	(D) - Chemicals and Drugs	840	15	2.8274	0.0242904	7	11
614	Transforming Growth Factor beta1	(D) - Chemicals and Drugs	1792	15	3.1564	0.0475119	9	8
622	Eye Proteins	(D) - Chemicals and Drugs	1813	15	3.1615	0.0442982	9	7
623	Ataxia Telangiectasia Mutated Proteins	(D) - Chemicals and Drugs	1814	15	3.1617	0.0441481	12	5
630	Cyclin D1	(D) - Chemicals and Drugs	1824	15	3.1641	0.0426616	9	8
636	Kruppel-Like Transcription Factors	(D) - Chemicals and Drugs	1842	15	3.1684	0.0400569	12	7
692	Lipopolysaccharides	(D) - Chemicals and Drugs	1981	15	3.2	0.0232914	8	8
720	Mechanistic Target of Rapamycin Complex 2	(D) - Chemicals and Drugs	2067	15	3.2184	0.0159017	9	9
724	Escherichia coli Proteins	(D) - Chemicals and Drugs	2078	15	3.2207	0.0151079	9	6
760	Estrogen Receptor alpha	(D) - Chemicals and Drugs	2191	15	3.2437	0.00866587	8	8
784	Cyclin-Dependent Kinase Inhibitor p21	(D) - Chemicals and Drugs	2228	15	3.251	0.00714231	9	8
713	Oncogene Proteins, Fusion	(D) - Chemicals and Drugs	1770	14	3.211	0.0369086	6	11
721	Ubiquitin-Protein Ligase Complexes	(D) - Chemicals and Drugs	1803	14	3.219	0.0324708	10	5
113	Phosphothreonine	(D) - Chemicals and Drugs	443	13	2.6738	0.00104283	8	8
206	Myosin Heavy Chains	(D) - Chemicals and Drugs	641	13	2.8342	0.0156348	11	6
225	Acyltransferases	(D) - Chemicals and Drugs	676	13	2.8573	0.0214117	9	6
251	Thrombin	(D) - Chemicals and Drugs	725	13	2.8877	0.0313049	8	6
262	Tacrolimus Binding Proteins	(D) - Chemicals and Drugs	741	13	2.8972	0.0349503	9	4
748	Histone Acetyltransferases	(D) - Chemicals and Drugs	1607	13	3.2334	0.0475731	8	7
788	Carbon-Nitrogen Ligases	(D) - Chemicals and Drugs	1687	13	3.2545	0.0351601	9	4
1021	Proto-Oncogene Proteins p21(ras)	(D) - Chemicals and Drugs	2127	13	3.3552	0.00380795	9	5
1131	RNA, Untranslated	(D) - Chemicals and Drugs	2342	13	3.397	0.000968539	9	5
1591	Ribosomal Proteins	(D) - Chemicals and Drugs	3814	13	3.6088	2.6333e-09	10	4
131	Actinin	(D) - Chemicals and Drugs	408	12	2.7076	0.0015484	8	5
212	Thrombospondins	(D) - Chemicals and Drugs	552	12	2.8388	0.0126831	4	8
253	ras GTPase-Activating Proteins	(D) - Chemicals and Drugs	619	12	2.8886	0.0243826	6	8
259	Alcohol Oxidoreductases	(D) - Chemicals and Drugs	630	12	2.8963	0.0267432	8	7
883	RNA, Guide	(D) - Chemicals and Drugs	1572	12	3.2934	0.0379665	9	5
927	Doxorubicin	(D) - Chemicals and Drugs	1632	12	3.3096	0.0294754	6	7
1081	ELAV Proteins	(D) - Chemicals and Drugs	1913	12	3.3786	0.00708586	8	5
1586	RNA, Long Noncoding	(D) - Chemicals and Drugs	3237	12	3.6071	2.24381e-07	5	8
1648	Retroelements	(D) - Chemicals and Drugs	3475	12	3.6379	2.18164e-08	7	5
91	Heparan Sulfate Proteoglycans	(D) - Chemicals and Drugs	288	11	2.6319	0.000321722	6	6
193	Mitogen-Activated Protein Kinase 8	(D) - Chemicals and Drugs	443	11	2.8189	0.00728838	5	9
272	Receptors, N-Methyl-D-Aspartate	(D) - Chemicals and Drugs	542	11	2.9065	0.023177	7	6
280	Calcium-Calmodulin-Dependent Protein Kinase Type 2	(D) - Chemicals and Drugs	550	11	2.9128	0.0249748	7	7
306	Phosphatidylinositol Phosphates	(D) - Chemicals and Drugs	588	11	2.9419	0.0344962	6	7
343	Cations	(D) - Chemicals and Drugs	620	11	2.9649	0.0436175	5	6
1232	Ku Autoantigen	(D) - Chemicals and Drugs	1900	11	3.4512	0.00399514	7	5
151	Cathepsin D	(D) - Chemicals and Drugs	315	10	2.7536	0.0021546	3	7
358	Benzoquinones	(D) - Chemicals and Drugs	531	10	2.9804	0.0395798	4	8
387	Angiogenesis Inhibitors	(D) - Chemicals and Drugs	559	10	3.0027	0.0487546	7	3
1094	Snail Family Transcription Factors	(D) - Chemicals and Drugs	1340	10	3.3824	0.044849	5	7
1199	Receptors, Immunologic	(D) - Chemicals and Drugs	1513	10	3.4351	0.0199164	5	6
233	Aspartate Aminotransferases	(D) - Chemicals and Drugs	331	9	2.8666	0.00841961	4	5
273	Transcription Factor TFIIIA	(D) - Chemicals and Drugs	363	9	2.9067	0.0137272	6	4
281	Sulfhydryl Compounds	(D) - Chemicals and Drugs	371	9	2.9162	0.0153292	4	6
285	Glycosyltransferases	(D) - Chemicals and Drugs	375	9	2.9208	0.0161725	6	5
301	Ceramides	(D) - Chemicals and Drugs	388	9	2.9356	0.0191094	3	8
314	Cyclin-Dependent Kinase 5	(D) - Chemicals and Drugs	398	9	2.9467	0.021572	7	3
347	Dietary Fats	(D) - Chemicals and Drugs	424	9	2.9742	0.0287831	4	6
356	Monosaccharide Transport Proteins	(D) - Chemicals and Drugs	428	9	2.9782	0.0299923	5	5
360	Myosin Type II	(D) - Chemicals and Drugs	432	9	2.9823	0.0312268	6	4
375	Low Density Lipoprotein Receptor-Related Protein-6	(D) - Chemicals and Drugs	445	9	2.9951	0.0354082	3	7
408	Receptor, Angiotensin, Type 1	(D) - Chemicals and Drugs	470	9	3.0189	0.0441088	4	5
410	Lactams, Macrocyclic	(D) - Chemicals and Drugs	471	9	3.0198	0.0444729	3	8
423	Thioredoxins	(D) - Chemicals and Drugs	481	9	3.0289	0.0481736	3	8
424	L-Lactate Dehydrogenase	(D) - Chemicals and Drugs	485	9	3.0325	0.0496822	7	3
425	Matrix Metalloproteinase 13	(D) - Chemicals and Drugs	485	9	3.0325	0.0496822	4	6
1211	Ligases	(D) - Chemicals and Drugs	1244	9	3.4416	0.0448473	6	5
1252	Antigens, CD34	(D) - Chemicals and Drugs	1297	9	3.4597	0.035201	6	5
1318	Autoantibodies	(D) - Chemicals and Drugs	1403	9	3.4938	0.0206084	7	4
1329	DNA Transposable Elements	(D) - Chemicals and Drugs	1432	9	3.5027	0.0176069	8	1
1446	RecQ Helicases	(D) - Chemicals and Drugs	1600	9	3.5509	0.00651521	8	2
382	Molecular Motor Proteins	(D) - Chemicals and Drugs	355	8	2.9993	0.0285542	7	3
394	Wnt3A Protein	(D) - Chemicals and Drugs	363	8	3.009	0.0312928	5	5
426	Qa-SNARE Proteins	(D) - Chemicals and Drugs	387	8	3.0368	0.0402361	5	4
430	Glycosaminoglycans	(D) - Chemicals and Drugs	388	8	3.0379	0.0406306	3	5
445	Ankyrins	(D) - Chemicals and Drugs	397	8	3.0479	0.0442518	7	3
449	Receptors, AMPA	(D) - Chemicals and Drugs	399	8	3.0501	0.045073	5	5
460	Sodium Channels	(D) - Chemicals and Drugs	406	8	3.0576	0.0479916	6	5
1335	Dipeptides	(D) - Chemicals and Drugs	1138	8	3.5052	0.046751	2	7
1360	DNA-(Apurinic or Apyrimidinic Site) Lyase	(D) - Chemicals and Drugs	1163	8	3.5147	0.0415941	3	7
1406	Fluorescent Dyes	(D) - Chemicals and Drugs	1226	8	3.5376	0.0304194	3	6
1422	RNA Helicases	(D) - Chemicals and Drugs	1242	8	3.5432	0.0279843	7	3
165	Hydro-Lyases	(D) - Chemicals and Drugs	160	7	2.7692	0.00177748	4	3
407	Chondroitin Sulfate Proteoglycans	(D) - Chemicals and Drugs	284	7	3.0184	0.0266626	3	4
420	Calcium Channel Blockers	(D) - Chemicals and Drugs	290	7	3.0275	0.0289259	4	5
464	Calcium Channels, N-Type	(D) - Chemicals and Drugs	314	7	3.062	0.0388997	6	4
470	Furin	(D) - Chemicals and Drugs	316	7	3.0648	0.0397925	5	3
474	Thrombospondin 1	(D) - Chemicals and Drugs	318	7	3.0675	0.0406941	5	3
475	Receptors, Nerve Growth Factor	(D) - Chemicals and Drugs	318	7	3.0675	0.0406941	6	3
487	Receptors, GABA-A	(D) - Chemicals and Drugs	322	7	3.0729	0.0425228	4	3
494	Collagen Type II	(D) - Chemicals and Drugs	324	7	3.0756	0.0434495	5	3
495	Procollagen	(D) - Chemicals and Drugs	324	7	3.0756	0.0434495	3	4
509	Endothelial Growth Factors	(D) - Chemicals and Drugs	331	7	3.0849	0.0467548	3	4
1528	Histidine	(D) - Chemicals and Drugs	1038	7	3.5813	0.0472908	5	3
1553	Histone Deacetylase 1	(D) - Chemicals and Drugs	1069	7	3.5941	0.0405285	4	4
1650	Exoribonucleases	(D) - Chemicals and Drugs	1186	7	3.6392	0.0213721	4	4
255	Excitatory Amino Acid Antagonists	(D) - Chemicals and Drugs	156	6	2.8921	0.00651573	4	3
265	Fibrillins	(D) - Chemicals and Drugs	159	6	2.9004	0.00707972	4	2
291	Acyl Coenzyme A	(D) - Chemicals and Drugs	169	6	2.9269	0.0091929	2	5
366	Ataxin-7	(D) - Chemicals and Drugs	194	6	2.9868	0.0161409	4	3
391	Myristic Acid	(D) - Chemicals and Drugs	203	6	3.0065	0.0192456	4	4
455	Phospholipases A	(D) - Chemicals and Drugs	227	6	3.055	0.0290692	3	4
471	TRPV Cation Channels	(D) - Chemicals and Drugs	233	6	3.0663	0.0318607	2	5
490	Tenascin	(D) - Chemicals and Drugs	237	6	3.0737	0.0337917	6	2
499	MAP Kinase Kinase Kinase 3	(D) - Chemicals and Drugs	240	6	3.0792	0.0352755	3	3
512	Edetic Acid	(D) - Chemicals and Drugs	244	6	3.0864	0.0373	5	1
517	Collagen Type III	(D) - Chemicals and Drugs	246	6	3.0899	0.0383314	2	4
522	Lysophospholipase	(D) - Chemicals and Drugs	248	6	3.0934	0.0393753	5	1
526	Phosphate-Binding Proteins	(D) - Chemicals and Drugs	249	6	3.0952	0.0399018	3	3
531	Cyanogen Bromide	(D) - Chemicals and Drugs	252	6	3.1004	0.0414994	5	1
545	Coat Protein Complex I	(D) - Chemicals and Drugs	257	6	3.1089	0.04422	3	3
1719	Kinesin	(D) - Chemicals and Drugs	935	6	3.6698	0.0483078	4	3
1762	Protease Inhibitors	(D) - Chemicals and Drugs	971	6	3.6862	0.0398914	2	4
1779	DNA Restriction Enzymes	(D) - Chemicals and Drugs	989	6	3.6942	0.0361226	3	4
1788	Poly (ADP-Ribose) Polymerase-1	(D) - Chemicals and Drugs	1003	6	3.7003	0.0333871	2	4
1793	DNA-Activated Protein Kinase	(D) - Chemicals and Drugs	1009	6	3.7029	0.0322659	6	0
1795	Chemokines	(D) - Chemicals and Drugs	1014	6	3.705	0.0313546	4	3
1805	Thiazides	(D) - Chemicals and Drugs	1023	6	3.7088	0.0297663	3	4
1813	Fluorouracil	(D) - Chemicals and Drugs	1031	6	3.7122	0.0284094	2	4
1863	Interleukin-10	(D) - Chemicals and Drugs	1086	6	3.7348	0.0203902	2	4
1887	Poly(ADP-ribose) Polymerase Inhibitors	(D) - Chemicals and Drugs	1126	6	3.7505	0.0158399	4	3
244	Endostatins	(D) - Chemicals and Drugs	105	5	2.8785	0.00546052	3	3
315	Blood Group Antigens	(D) - Chemicals and Drugs	123	5	2.9472	0.0100101	2	4
359	Pepsin A	(D) - Chemicals and Drugs	133	5	2.9812	0.0133273	3	3
398	MADS Domain Proteins	(D) - Chemicals and Drugs	143	5	3.0127	0.0172314	2	3
416	Pyrones	(D) - Chemicals and Drugs	147	5	3.0246	0.0189579	4	2
443	Lithium	(D) - Chemicals and Drugs	155	5	3.0477	0.0226905	3	2
463	Polyamines	(D) - Chemicals and Drugs	160	5	3.0615	0.0252092	5	0
473	Lipoproteins, VLDL	(D) - Chemicals and Drugs	162	5	3.0668	0.0262558	1	4
479	Plectin	(D) - Chemicals and Drugs	163	5	3.0695	0.0267874	3	3
528	Organophosphorus Compounds	(D) - Chemicals and Drugs	174	5	3.0979	0.0329879	2	3
537	Iron-Binding Proteins	(D) - Chemicals and Drugs	177	5	3.1053	0.034787	0	5
550	Receptor, Notch3	(D) - Chemicals and Drugs	180	5	3.1126	0.0366301	2	3
558	N-Methylaspartate	(D) - Chemicals and Drugs	182	5	3.1174	0.0378826	2	4
607	Adrenergic beta-Agonists	(D) - Chemicals and Drugs	196	5	3.1496	0.0471439	2	3
610	Furans	(D) - Chemicals and Drugs	197	5	3.1518	0.047836	0	5
1953	TATA-Box Binding Protein	(D) - Chemicals and Drugs	852	5	3.7878	0.0437783	3	3
1961	Histocompatibility Antigens Class I	(D) - Chemicals and Drugs	857	5	3.7903	0.0425362	2	3
2001	Culture Media, Serum-Free	(D) - Chemicals and Drugs	890	5	3.8067	0.0350128	3	2
2024	Cell Extracts	(D) - Chemicals and Drugs	918	5	3.8202	0.0295022	3	3
2429	Nucleotides	(D) - Chemicals and Drugs	2447	5	4.246	2.6779e-08	4	2
87	Receptor Activity-Modifying Protein 3	(D) - Chemicals and Drugs	37	4	2.6194	0.0007101	1	3
260	Fibroblast Growth Factor 8	(D) - Chemicals and Drugs	70	4	2.8963	0.00683514	3	2
309	Dizocilpine Maleate	(D) - Chemicals and Drugs	78	4	2.9432	0.00972901	2	3
336	Hydroxyproline	(D) - Chemicals and Drugs	81	4	2.9596	0.0109754	2	2
364	Electron Transport Complex III	(D) - Chemicals and Drugs	86	4	2.9857	0.0132512	3	2
384	Losartan	(D) - Chemicals and Drugs	89	4	3.0005	0.014736	1	3
415	Abietanes	(D) - Chemicals and Drugs	94	4	3.0243	0.017409	1	4
441	Mannosyl-Glycoprotein Endo-beta-N-Acetylglucosaminidase	(D) - Chemicals and Drugs	99	4	3.0468	0.020327	0	4
442	Receptors, Adrenergic, beta-1	(D) - Chemicals and Drugs	99	4	3.0468	0.020327	3	2
451	Cartilage Oligomeric Matrix Protein	(D) - Chemicals and Drugs	100	4	3.0512	0.0209396	2	3
476	Matrilin Proteins	(D) - Chemicals and Drugs	104	4	3.0682	0.0234849	2	3
483	Caspase 6	(D) - Chemicals and Drugs	105	4	3.0723	0.0241447	3	2
502	Azo Compounds	(D) - Chemicals and Drugs	107	4	3.0805	0.0254919	2	3
527	CD47 Antigen	(D) - Chemicals and Drugs	111	4	3.0965	0.028295	1	3
530	Mitogen-Activated Protein Kinase 10	(D) - Chemicals and Drugs	112	4	3.1004	0.0290179	3	3
536	Lipoprotein(a)	(D) - Chemicals and Drugs	113	4	3.1042	0.0297496	1	3
560	Diuretics	(D) - Chemicals and Drugs	117	4	3.1193	0.0327613	3	1
573	Angiopoietin-like Proteins	(D) - Chemicals and Drugs	119	4	3.1267	0.0343169	1	3
578	Syndecan-4	(D) - Chemicals and Drugs	120	4	3.1303	0.0351068	2	3
599	Fibrillin-1	(D) - Chemicals and Drugs	124	4	3.1446	0.0383447	2	2
624	Adaptor Protein Complex alpha Subunits	(D) - Chemicals and Drugs	129	4	3.1617	0.0425595	2	2
637	Naphthoquinones	(D) - Chemicals and Drugs	131	4	3.1684	0.0442946	2	2
638	Chemokine CCL21	(D) - Chemicals and Drugs	131	4	3.1684	0.0442946	3	1
657	Fatty Acids, Omega-6	(D) - Chemicals and Drugs	135	4	3.1815	0.0478437	2	3
667	Uncoupling Protein 1	(D) - Chemicals and Drugs	137	4	3.1879	0.0496556	2	2
2162	Prostate-Specific Antigen	(D) - Chemicals and Drugs	728	4	3.9133	0.0495034	1	4
2163	Sirolimus	(D) - Chemicals and Drugs	729	4	3.9139	0.0492029	2	2
2171	Culture Media	(D) - Chemicals and Drugs	743	4	3.9221	0.0451432	2	2
2176	Progesterone	(D) - Chemicals and Drugs	751	4	3.9268	0.042945	2	2
2193	Nucleocytoplasmic Transport Proteins	(D) - Chemicals and Drugs	769	4	3.9371	0.0383124	4	2
2209	RNA, Small Nuclear	(D) - Chemicals and Drugs	789	4	3.9482	0.033652	2	3
2211	Ribonuclease III	(D) - Chemicals and Drugs	792	4	3.9499	0.0329953	3	2
2213	Immunosuppressive Agents	(D) - Chemicals and Drugs	792	4	3.9499	0.0329953	1	3
2241	Hepatitis B Antibodies	(D) - Chemicals and Drugs	843	4	3.977	0.0233783	2	2
2248	Hepatitis B Vaccines	(D) - Chemicals and Drugs	849	4	3.9801	0.0224241	2	2
59	Collagen Type XII	(D) - Chemicals and Drugs	17	3	2.5315	0.000814891	3	0
177	Mesalamine	(D) - Chemicals and Drugs	31	3	2.7924	0.00460876	0	3
218	Ammonium Sulfate	(D) - Chemicals and Drugs	35	3	2.8451	0.006418	2	1
235	Dihydropyridines	(D) - Chemicals and Drugs	37	3	2.8692	0.00745122	2	2
256	Alkenes	(D) - Chemicals and Drugs	39	3	2.8921	0.00857077	2	1
268	Amlodipine	(D) - Chemicals and Drugs	40	3	2.9031	0.00916294	2	1
269	Cyclohexanecarboxylic Acids	(D) - Chemicals and Drugs	40	3	2.9031	0.00916294	0	3
287	Spider Venoms	(D) - Chemicals and Drugs	42	3	2.9243	0.010412	1	2
326	Ryanodine	(D) - Chemicals and Drugs	45	3	2.9542	0.0124463	2	2
403	Tropoelastin	(D) - Chemicals and Drugs	52	3	3.017	0.0179279	1	2
404	Diclofenac	(D) - Chemicals and Drugs	52	3	3.017	0.0179279	2	1
436	Phosphoglucomutase	(D) - Chemicals and Drugs	55	3	3.0414	0.0205815	3	0
448	Caveolin 3	(D) - Chemicals and Drugs	56	3	3.0492	0.0215051	0	3
458	Vitamin B 6	(D) - Chemicals and Drugs	57	3	3.0569	0.0224478	2	2
459	alpha-Galactosidase	(D) - Chemicals and Drugs	57	3	3.0569	0.0224478	1	2
469	Uncoupling Protein 3	(D) - Chemicals and Drugs	58	3	3.0645	0.0234094	1	2
511	Mitogen-Activated Protein Kinase 11	(D) - Chemicals and Drugs	61	3	3.0864	0.026405	2	2
540	Indans	(D) - Chemicals and Drugs	64	3	3.1072	0.0295607	2	3
575	Carbohydrate Epimerases	(D) - Chemicals and Drugs	67	3	3.1271	0.0328686	2	1
582	Retinaldehyde	(D) - Chemicals and Drugs	68	3	3.1335	0.0340037	2	1
583	Calcium Channels, T-Type	(D) - Chemicals and Drugs	68	3	3.1335	0.0340037	2	1
585	Dual Oxidases	(D) - Chemicals and Drugs	68	3	3.1335	0.0340037	0	3
595	NADPH Dehydrogenase	(D) - Chemicals and Drugs	69	3	3.1399	0.0351543	1	2
596	Myosin Type I	(D) - Chemicals and Drugs	69	3	3.1399	0.0351543	3	0
601	Calcium Channel Agonists	(D) - Chemicals and Drugs	70	3	3.1461	0.0363203	1	2
602	TNF Receptor-Associated Factor 5	(D) - Chemicals and Drugs	70	3	3.1461	0.0363203	1	2
617	Fibrillar Collagens	(D) - Chemicals and Drugs	72	3	3.1584	0.038697	3	0
640	Elongation Factor 2 Kinase	(D) - Chemicals and Drugs	74	3	3.1703	0.041131	2	1
653	Integrin-Binding Sialoprotein	(D) - Chemicals and Drugs	75	3	3.1761	0.0423686	2	1
664	Antimanic Agents	(D) - Chemicals and Drugs	77	3	3.1875	0.0448834	3	0
679	Tacrolimus Binding Protein 1A	(D) - Chemicals and Drugs	78	3	3.1931	0.0461598	3	2
687	Collagen Type VI	(D) - Chemicals and Drugs	79	3	3.1987	0.0474485	1	2
688	Bone Morphogenetic Protein 1	(D) - Chemicals and Drugs	79	3	3.1987	0.0474485	3	0
689	Non-Fibrillar Collagens	(D) - Chemicals and Drugs	79	3	3.1987	0.0474485	2	2
690	Otx Transcription Factors	(D) - Chemicals and Drugs	79	3	3.1987	0.0474485	3	0
698	Endothelial Protein C Receptor	(D) - Chemicals and Drugs	80	3	3.2041	0.0487491	1	2
2347	Cytochrome P-450 Enzyme System	(D) - Chemicals and Drugs	638	3	4.1059	0.0446018	0	3
2350	Endonucleases	(D) - Chemicals and Drugs	639	3	4.1065	0.0442959	2	1
2378	Antigens, CD20	(D) - Chemicals and Drugs	711	3	4.1529	0.0264505	2	2
2385	Immunoglobulin Variable Region	(D) - Chemicals and Drugs	729	3	4.1638	0.0231193	3	0
2411	RNA, Small Nucleolar	(D) - Chemicals and Drugs	811	3	4.2101	0.0122109	2	1
101	Linolenic Acids	(D) - Chemicals and Drugs	10	2	2.6532	0.00517896	0	2
125	Imidazolines	(D) - Chemicals and Drugs	11	2	2.6946	0.00625938	0	2
163	Chlorthalidone	(D) - Chemicals and Drugs	13	2	2.7672	0.00868039	1	1
164	Cationic Amino Acid Transporter 2	(D) - Chemicals and Drugs	13	2	2.7672	0.00868039	1	1
181	Porphobilinogen Synthase	(D) - Chemicals and Drugs	14	2	2.7993	0.0100144	1	1
202	Gabapentin	(D) - Chemicals and Drugs	15	2	2.8293	0.0114264	0	2
203	2-Naphthylamine	(D) - Chemicals and Drugs	15	2	2.8293	0.0114264	1	1
224	Heparin Cofactor II	(D) - Chemicals and Drugs	16	2	2.8573	0.0129133	1	1
226	DNA, B-Form	(D) - Chemicals and Drugs	16	2	2.8573	0.0129133	2	0
227	Collagen Type XIII	(D) - Chemicals and Drugs	16	2	2.8573	0.0129133	0	2
249	Mibefradil	(D) - Chemicals and Drugs	17	2	2.8837	0.0144721	1	1
297	Ferricyanides	(D) - Chemicals and Drugs	19	2	2.932	0.0177935	1	1
324	Globosides	(D) - Chemicals and Drugs	20	2	2.9542	0.0195503	1	1
325	Lisinopril	(D) - Chemicals and Drugs	20	2	2.9542	0.0195503	1	1
327	Doxazosin	(D) - Chemicals and Drugs	20	2	2.9542	0.0195503	1	1
328	Phospholipases A1	(D) - Chemicals and Drugs	20	2	2.9542	0.0195503	1	1
348	Bone Morphogenetic Protein 3	(D) - Chemicals and Drugs	21	2	2.9754	0.0213675	1	1
349	Phytochemicals	(D) - Chemicals and Drugs	21	2	2.9754	0.0213675	1	1
376	5,10-Methylenetetrahydrofolate Reductase (FADH2)	(D) - Chemicals and Drugs	22	2	2.9956	0.0232425	1	1
450	3-Pyridinecarboxylic acid, 1,4-dihydro-2,6-dimethyl-5-nitro-4-(2-(trifluoromethyl)phenyl)-, Methyl ester	(D) - Chemicals and Drugs	25	2	3.0512	0.0291874	1	1
452	Carnitine Acyltransferases	(D) - Chemicals and Drugs	25	2	3.0512	0.0291874	0	2
506	Prokaryotic Initiation Factor-3	(D) - Chemicals and Drugs	27	2	3.0846	0.0333924	1	1
552	Acyl-CoA Dehydrogenase, Long-Chain	(D) - Chemicals and Drugs	29	2	3.1156	0.0377688	0	2
553	Receptors, Purinergic P2X4	(D) - Chemicals and Drugs	29	2	3.1156	0.0377688	2	0
579	Collagen Type IX	(D) - Chemicals and Drugs	30	2	3.1303	0.0400155	2	0
598	Quinolinic Acid	(D) - Chemicals and Drugs	31	2	3.1446	0.0422984	2	0
618	Methylmercury Compounds	(D) - Chemicals and Drugs	32	2	3.1584	0.0446154	1	1
643	Macrocyclic Compounds	(D) - Chemicals and Drugs	33	2	3.1717	0.0469644	0	2
644	3-Hydroxybutyric Acid	(D) - Chemicals and Drugs	33	2	3.1717	0.0469644	0	2
645	Cilostazol	(D) - Chemicals and Drugs	33	2	3.1717	0.0469644	0	2
2461	Antigens, Differentiation, T-Lymphocyte	(D) - Chemicals and Drugs	512	2	4.3625	0.0498726	2	0
2462	Antigens, Bacterial	(D) - Chemicals and Drugs	517	2	4.3667	0.0479963	1	1
2463	Butadienes	(D) - Chemicals and Drugs	518	2	4.3675	0.0476284	0	2
2464	Glucuronosyltransferase	(D) - Chemicals and Drugs	547	2	4.3912	0.037971	1	1
2465	TCF Transcription Factors	(D) - Chemicals and Drugs	549	2	4.3928	0.0373733	2	0
2466	Octamer Transcription Factor-3	(D) - Chemicals and Drugs	557	2	4.3991	0.0350648	2	0
2467	Early Growth Response Protein 1	(D) - Chemicals and Drugs	558	2	4.3998	0.0347853	1	1
2468	Cytidine Deaminase	(D) - Chemicals and Drugs	594	2	4.427	0.0259582	1	1
2469	TATA-Binding Protein Associated Factors	(D) - Chemicals and Drugs	595	2	4.4277	0.0257448	2	2
2470	Acetylcysteine	(D) - Chemicals and Drugs	600	2	4.4314	0.0247015	0	2
2471	Smoke	(D) - Chemicals and Drugs	614	2	4.4414	0.0219816	0	2
2472	Transcription Factors, TFII	(D) - Chemicals and Drugs	616	2	4.4428	0.0216161	2	0
2473	Granulocyte-Macrophage Colony-Stimulating Factor	(D) - Chemicals and Drugs	633	2	4.4546	0.0187273	1	1
2474	Kallikreins	(D) - Chemicals and Drugs	648	2	4.4648	0.0164778	0	2
2475	S100 Proteins	(D) - Chemicals and Drugs	694	2	4.4946	0.0110455	0	2
2476	Deoxyribonuclease I	(D) - Chemicals and Drugs	1128	2	4.7055	0.000169255	1	1
